# Supplementary material for: A Long-term Global Comparison of IMERG and CFSR with Surface Precipitation Stations
Source: Research Square preprint supplement (doi:10.21203/rs.3.rs-1650617/v1), 2022-06-29
Supplement: Supplementary file 1 [file 4ae3373b753c7c299e848809.docx]

**Table S3. Mean of performance metrices computed for IMERG and CFSR precipitation and their P values when tested for the significance for each continent**

| Region | Africa | Asia | Australia | Europe | N_America | Russia | S_America |
| --- | --- | --- | --- | --- | --- | --- | --- |
| NSE_IMERG | 0.19 | 0.5 | 0.71 | 0.48 | 0.59 | -0.03 | 0.25 |
| NSE_CFSR | -0.06 | -0.22 | 0.46 | 0.1 | -0.17 | -0.5 | -0.95 |
| P_NSE | 0.12 | 0 | 0 | 0 | 0 | 0 | 0 |
| KGE_IMERG | 0.38 | 0.59 | 0.75 | 0.68 | 0.68 | 0.5 | 0.43 |
| KGE_CFSR | 0.34 | 0.33 | 0.65 | 0.56 | 0.41 | 0.33 | 0.1 |
| P_KGE | 0.53 | 0 | 0 | 0 | 0 | 0 | 0 |
| VE_IMERG | 0.33 | 0.55 | 0.67 | 0.68 | 0.66 | 0.53 | 0.41 |
| VE_CFSR | 0.29 | 0.31 | 0.54 | 0.56 | 0.45 | 0.33 | 0.23 |
| P_VE | 0.61 | 0 | 0 | 0 | 0 | 0 | 0.09 |
| R_IMERG | 0.79 | 0.87 | 0.9 | 0.89 | 0.86 | 0.87 | 0.82 |
| R_CFSR | 0.63 | 0.71 | 0.78 | 0.81 | 0.71 | 0.73 | 0.57 |
| P_R | 0 | 0 | 0 | 0 | 0 | 0 | 0 |
| RMSE_IMERG | 33.75 | 44.01 | 26.87 | 25.16 | 32.42 | 24.74 | 54.11 |
| RMSE_CFSR | 46.88 | 75.99 | 37.74 | 33.54 | 50.69 | 32.86 | 98.19 |
| P_RMSE | 0.03 | 0 | 0 | 0 | 0 | 0 | 0 |
| PBIAS_IMERG | 36.04 | 24 | 9.36 | 23.03 | 11.46 | 40.7 | 38.14 |
| PBIAS_CFSR | 2.05 | 25.62 | 0.87 | 30.56 | 23.45 | 52.57 | 22.74 |
| P_PBIAS | 0 | 0.62 | 0 | 0 | 0 | 0 | 0.17 |
